# Supplementary material
Source: bioRxiv or medRxiv preprint supplement (https://www.biorxiv.org/highwire/filestream/59325/field_highwire_adjunct_files/0/141127-1.pdf)
Supplement: Supplementary file [file 141127-1.pdf]

Appendix 1: Accessions details for samples used in phylogenetic analyses, with Genbank accession codes (XXXX currently in the process of submission). Species represented by multiple accessions are discerned with four-digit codes (as also represented in the phylogenetic trees) following the names.

| Species                                                          | Collection          | Country       | <i>matK</i> | <i>ndhF</i> | <i>rbcl</i> | <i>atpB-rbcl</i> | <i>psbA-trnH</i> | <i>trnTL</i> | <i>trnLF</i>         | <i>pseudotrnlF</i> | malate synthase | PHYC |
|------------------------------------------------------------------|---------------------|---------------|-------------|-------------|-------------|------------------|------------------|--------------|----------------------|--------------------|-----------------|------|
| <i>Annickia pilosa</i> (Exell) Setten & Maas                     | Sosef 1803 (WAG)    | Gabon         | AY743488    | AY841402    | AY743450    | AY841371         | AY841444         | AY841572     | AY743469             | —                  | —               | —    |
| <i>Klarobelia inundata</i> Chatrou                               | Chatrou 205 (U)     | Peru          | AY743490    | AY841409    | AY743452    | AY841378         | AY841469         | AY841577     | AY743471             | —                  | —               | —    |
| <i>Klarobelia stipitata</i> Chatrou                              | Chatrou 113 (U)     | Costa Rica    | —           | —           | AY841628    | —                | AY841472         | —            | AY841706             | —                  | —               | —    |
| <i>Ephedranthus parviflorus</i> S.Moore                          | Prance 19246 (U)    | Brazil        | —           | —           | AY841615    | —                | AY841462         | —            | AY841693             | —                  | —               | XXXX |
| <i>Ephedranthus</i> sp.                                          | Maas 8826 (U)       | Brazil        | AY841396    | AY841407    | AY841616    | AY841376         | AY841463         | AY841575     | AY841694             | —                  | —               | —    |
| <i>Malmea dielsiana</i> R.E.Fr.                                  | Chatrou 122 (U)     | Peru          | AY238964    | AY841410    | AY238955    | AY841379         | AY841473         | AY841578     | AY231288<br>AY238948 | DQ018195           | —               | XXXX |
| <i>Malmea</i> sp.                                                | Chatrou 8 (U)       | Peru          | AY841397    | AY841411    | AY841527    | AY841380         | AY841475         | AY841579     | AY841541             | DQ018196           | —               | —    |
| <i>Onychopetalum periquino</i> (Rusby) D.M.Johnson & N.A. Murray | Chatrou 425 (U)     | Bolivia       | AY518876    | AY841414    | AY319065    | AY841383         | AY841485         | AY841582     | AY319179             | —                  | —               | —    |
| <i>Oxandra macrophylla</i> R.E.Fr.                               | Chatrou 204 (U)     | Peru          | —           | —           | AY841642    | —                | AY841491         | —            | AY841720             | —                  | —               | XXXX |
| <i>Oxandra venezuelana</i> R.E.Fr.                               | Chatrou 120 (U)     | Costa Rica    | —           | —           | AY841645    | —                | AY841495         | —            | AY841723             | —                  | —               | XXXX |
| <i>Pseudomalmea diclina</i> (R.E.Fr.) Chatrou                    | Chatrou 211 (U)     | Peru          | AY841398    | AY841419    | AY319068    | AY841388         | AY841506         | —            | AY319128             | —                  | XXXX            | XXXX |
| <i>Pseudoxandra lucida</i> R.E.Fr.                               | Chatrou 212/213 (U) | Peru          | AY518870    | AY841420    | AY319076    | AY841389         | AY841510         | AY841588     | AY319190             | —                  | —               | —    |
| <i>Pseudoxandra spiritus-sancti</i> Maas                         | Maas 8833 (U)       | Brazil        | AY841399    | AY841421    | AY841533    | AY841390         | AY841513         | AY841589     | AY841547             | —                  | —               | —    |
| <i>Sapranthus viridiflorus</i> G.E.Schatz                        | Chatrou 55 (U)      | Costa Rica    | AY743493    | AY841422    | AY319051    | AY841391         | AY841515         | AY841590     | AY319165             | —                  | —               | —    |
| Unknown genus                                                    | Tello 3416 (NY)     | Peru          | AY841520    | —           | —           | —                | AY841456         | —            | AY841534             | —                  | —               | —    |
| <i>Crematosperma brevipes</i> (DC) R.E.Fr.                       | Scharf 76 (U)       | French Guiana | AY743550    | AY841405    | AY743527    | AY841374         | AY841447         | AY841573     | AY743573             | DQ018191           | —               | XXXX |

| Species                                                    | Collection                             | Country   | matK     | ndhF     | rbcl     | atpB-rbcL | psbA-trnH | trnTL    | trnLF    | pseudtrnLF | malate synthase | PHYC |
|------------------------------------------------------------|----------------------------------------|-----------|----------|----------|----------|-----------|-----------|----------|----------|------------|-----------------|------|
| <i>Crematosperma bullatum</i><br>Pirie [1100]              | Pirie 71 (U)                           | Peru      | AY743560 | DQ018140 | AY743537 | —         | AY841459  | DQ018170 | AY743583 | DQ018220   | —               | —    |
| <i>Crematosperma bullatum</i><br>Pirie [1102]              | Pirie 94 (U)                           | Peru      | DQ018276 | DQ018142 | DQ018235 | —         | DQ018256  | DQ018172 | DQ018188 | DQ018221   | —               | —    |
| <i>Crematosperma cauliflorum</i><br>R.E.Fr. [0598]         | Maas 9029<br>(U)                       | Peru      | AY743548 | DQ018125 | AY743525 | —         | DQ018240  | DQ018150 | AY743571 | DQ018206   | —               | —    |
| <i>Crematosperma cauliflorum</i><br>R.E.Fr. [0312]         | Chatrou 224<br>(U)                     | Peru      | AY743542 | AY841406 | AY743519 | AY841375  | AY841448  | AY841574 | AY743565 | DQ018192   | —               | —    |
| <i>Crematosperma gracilipes</i><br>R.E.Fr.                 | Chatrou 267<br>(U)                     | Ecuador   | AY743544 | —        | AY743521 | —         | —         | —        | AY743567 | —          | —               | —    |
| <i>Crematosperma leiophyllum</i><br>(Diels) R.E.Fr.        | Pirie 2 (U)                            | Bolivia   | AY743546 | DQ018123 | AY743523 | —         | AY841449  | DQ018148 | AY743569 | DQ018193   | —               | —    |
| <i>Crematosperma longicuspe</i><br>R.E.Fr.                 | Woytkowski<br>7128 (GH,<br>MO, UC, US) | Peru      | XXXX     | XXXX     | XXXX     | —         | XXXX      | XXXX     | XXXX     | XXXX       | —               | —    |
| <i>Crematosperma macrocarpum</i><br>Maas                   | Wingfield<br>6751 (U)                  | Venezuela | AY743551 | DQ018129 | AY743528 | —         | AY841450  | DQ018154 | AY743574 | DQ018194   | —               | —    |
| <i>Crematosperma magdalenae</i><br>Pirie                   | Escobar 3309<br>(U)                    | Colombia  | DQ018279 | DQ018143 | AY841521 | —         | AY841460  | DQ018174 | AY841535 | —          | —               | —    |
| <i>Crematosperma megalophyllum</i><br>R.E.Fr. [0087]       | Maas 8595<br>(U)                       | Ecuador   | AY743540 | —        | AY743517 | —         | —         | —        | AY743563 | —          | —               | —    |
| <i>Crematosperma megalophyllum</i><br>R.E.Fr. [0494]       | Chatrou 268<br>(U)                     | Ecuador   | AY743543 | DQ018121 | AY743520 | —         | DQ018239  | DQ018146 | AY743566 | —          | —               | —    |
| <i>Crematosperma megalophyllum</i><br>R.E.Fr. [0493]       | Chatrou 259<br>(U)                     | Ecuador   | AY743545 | DQ018122 | AY743522 | —         | AY841451  | DQ018147 | AY743568 | —          | —               | —    |
| <i>Crematosperma microcarpum</i><br>R.E.Fr. [0082]         | Maas 8289<br>(U)                       | Peru      | AY743539 | —        | AY743516 | —         | —         | —        | AY743562 | —          | —               | —    |
| <i>Crematosperma microcarpum</i><br>R.E.Fr. [0303]         | Chatrou 208<br>(U)                     | Peru      | AY518874 | DQ018120 | AY319058 | —         | AY841452  | DQ018145 | AY319172 | DQ018204   | —               | —    |
| <i>Crematosperma monospermum</i><br>(Rusby) R.E.Fr. [0753] | Killip 28691<br>(US, F, NY)            | Peru      | AY743566 | —        | AY743533 | —         | —         | —        | AY743579 | —          | —               | —    |
| <i>Crematosperma monospermum</i><br>(Rusby) R.E.Fr. [0596] | Pirie 4 (U)                            | Bolivia   | AY743547 | DQ018124 | AY743524 | —         | AY841453  | DQ018149 | AY743570 | DQ018205   | —               | —    |
| <i>Crematosperma napoense</i><br>Pirie                     | Neil 7649 (U)                          | Ecuador   | DQ018265 | DQ018127 | DQ018224 | —         | DQ018242  | DQ018152 | DQ018177 | DQ018208   | —               | —    |
| <i>Crematosperma novogranatense</i><br>R.E.Fr.             | Devia 5335<br>(MO)                     | Colombia  | AY743552 | —        | AY743529 | —         | —         | DQ018156 | AY743529 | —          | —               | —    |
| <i>Crematosperma oblongum</i><br>R.E.Fr. [0600]            | Maas 9148<br>(U)                       | Brazil    | AY743549 | DQ018126 | AY743526 | —         | DQ018241  | DQ018151 | AY743572 | DQ018207   | —               | —    |

| Species                                                       | Collection               | Country    | matK     | ndhF     | rbcl     | atpB-rbcL | psbA-trnH | trnTL    | trnLF    | pseudtrnLF | malate synthase | PHYC |
|---------------------------------------------------------------|--------------------------|------------|----------|----------|----------|-----------|-----------|----------|----------|------------|-----------------|------|
| <i>Crematosperma oblongum</i><br>R.E.Fr. [0739]               | Morawetz<br>25985 (U)    | Peru       | DQ018266 | DQ018128 | DQ018225 | —         | DQ018243  | DQ018153 | DQ018178 | DQ018209   | —               | —    |
| <i>Crematosperma oblongum</i><br>R.E.Fr. [1097]               | Pirie 7 (U)              | Peru       | DQ018273 | DQ018137 | DQ018232 | —         | DQ018253  | DQ018165 | DQ018185 | DQ018215   | —               | —    |
| <i>Crematosperma panamense</i><br>Maas                        | Miller 947 (U)           | Panama     | AY743553 | DQ018131 | AY743530 | —         | DQ018246  | DQ018158 | AY743576 | DQ018211   | —               | —    |
| <i>Crematosperma pedunculatum</i><br>(Diels) R.E.Fr. [0754]   | Gentry 80904<br>(U)      | Peru       | DQ018269 | —        | DQ018228 | —         | DQ018248  | DQ018161 | DQ018181 | —          | —               | —    |
| <i>Crematosperma pedunculatum</i><br>(Diels) R.E.Fr. [0760]   | Gentry 45510<br>(U)      | Peru       | AY743561 | DQ018135 | AY743538 | —         | DQ018251  | DQ018165 | AY743584 | DQ018215   | —               | —    |
| <i>Crematosperma pendulum</i><br>(Ruiz & Pav.) R.E.Fr. [0749] | Morawetz<br>9888 (U)     | Peru       | AY743554 | —        | AY743531 | —         | DQ018247  | DQ018159 | AY743577 | —          | —               | —    |
| <i>Crematosperma pendulum</i><br>(Ruiz & Pav.) R.E.Fr. [0751] | Graham 635<br>(U)        | Peru       | AY743555 | DQ018132 | AY743532 | —         | AY841454  | DQ018160 | AY743578 | DQ018212   | —               | —    |
| <i>Crematosperma pendulum</i><br>(Ruiz & Pav.) R.E.Fr. [1098] | Pirie 33 (U)             | Peru       | DQ018274 | DQ018138 | DQ018233 | —         | DQ018254  | DQ018168 | DQ018186 | DQ018218   | —               | —    |
| <i>Crematosperma peruvianum</i>                               | Rodríguez<br>1112 (U)    | Peru       | AY743557 | —        | AY743534 | —         | —         | —        | AY743580 | —          | —               | —    |
| <i>Crematosperma</i> sp.                                      | Barbosa 8008<br>(COL)    | Colombia   | XXXX     | —        | XXXX     | —         | XXXX      | XXXX     | XXXX     | —          | —               | —    |
| <i>Crematosperma</i> aff. sp. B                               | Foster 3418<br>(US)      | Peru       | DQ018271 | —        | DQ018230 | —         | DQ018250  | DQ018164 | DQ018183 | —          | —               | —    |
| <i>Crematosperma stenophyllum</i><br>Pirie                    | Knapp 6159<br>(COL)      | Ecuador    | XXXX     | XXXX     | XXXX     | —         | XXXX      | XXXX     | XXXX     | XXXX       | —               | —    |
| <i>Crematosperma venezuelanum</i><br>Pirie                    | Steyermark<br>94314 (NY) | Venezuela  | AY743559 | DQ018134 | AY743536 | —         | AY841457  | DQ018163 | AY743582 | DQ018214   | —               | —    |
| <i>Crematosperma westrae</i><br>Pirie                         | Oliver 3681<br>(MO)      | Panama     | DQ018272 | DQ018136 | DQ018231 | —         | DQ018252  | DQ018166 | DQ018184 | DQ018216   | —               | —    |
| <i>Crematosperma yamayakatense</i><br>Pirie [0742]            | Vásquez<br>19055 (U)     | Peru       | DQ018267 | —        | DQ018226 | —         | DQ018244  | DQ018155 | DQ018187 | —          | —               | —    |
| <i>Crematosperma yamayacatense</i><br>Pirie [1099]            | Pirie 57 (U)             | Peru       | AY743558 | DQ018139 | AY743535 | —         | AY841458  | DQ018169 | AY743581 | DQ018219   | —               | —    |
| <i>Crematosperma yamayakatense</i><br>Pirie [1101]            | Pirie 80 (U)             | Peru       | DQ018275 | DQ018141 | DQ018234 | —         | DQ018255  | DQ018171 | DQ018179 | —          | —               | —    |
| <i>Mosannonna costaricensis</i><br>(R.E.Fr.) Chatrou [0237]   | Chatrou 90<br>(U)        | Costa Rica | AY743503 | AY841413 | AY743510 | AY841382  | AY841479  | —        | AY743496 | —          | XXXX            | XXXX |
| <i>Mosannonna costaricensis</i><br>(R.E.Fr.) Chatrou [0238]   | Chatrou 91<br>(U)        | Costa Rica | XXXX     | —        | XXXX     | —         | XXXX      | —        | XXXX     | —          | —               | XXXX |

| Species                                                                        | Collection                | Country    | <i>matK</i> | <i>ndhF</i> | <i>rbcl</i> | <i>atpB-rbcL</i> | <i>psbA-trnH</i> | <i>trnTL</i> | <i>trnLF</i> | <i>pseudtrnLF</i> | malate synthase | PHYC |
|--------------------------------------------------------------------------------|---------------------------|------------|-------------|-------------|-------------|------------------|------------------|--------------|--------------|-------------------|-----------------|------|
| <i>Mosannona depressa</i> (Baill.)<br>Chatrou subsp. <i>abscondita</i> Chatrou | Vester s.n.<br>(U)        | Mexico     | XXXX        | XXXX        | XXXX        | XXXX             | XXXX             | —            | XXXX         | —                 | XXXX            | XXXX |
| <i>Mosannona depressa</i> (Baill.)<br>Chatrou subsp. <i>depressa</i>           | Calzada 1560<br>(U)       | Mexico     | XXXX        | XXXX        | XXXX        | XXXX             | XXXX             | —            | XXXX         | —                 | XXXX            | XXXX |
| <i>Mosannona discolor</i><br>(R.E.Fr.) Chatrou                                 | Jansen-Jacobs<br>6000 (U) | Surinam    | AY743504    | XXXX        | AY743511    | XXXX             | AY841480         | —            | AY743497     | —                 | XXXX            | XXXX |
| <i>Mosannona garwoodii</i><br>Chatrou & Welzenis                               | Garwood<br>3129 (U)       | Panama     | AY743505    |             | AY743512    | XXXX             | AY841481         | —            | AY743498     | —                 | XXXX            | XXXX |
| <i>Mosannona hypoglauca</i><br>(Standl.) Chatrou                               | Herrera 923<br>(U)        | Panama     | XXXX        | XXXX        | XXXX        | XXXX             | XXXX             | —            | XXXX         | —                 | —               | —    |
| <i>Mosannona pacifica</i><br>Chatrou                                           | Maas 8531<br>(U)          | Ecuador    | AY743506    | XXXX        | AY743513    | XXXX             | AY841482         | —            | AY743499     | —                 | XXXX            | XXXX |
| <i>Mosannona papillosa</i><br>Chatrou                                          | Pitman s.n.<br>(U)        | Ecuador    | AY743507    | XXXX        | AY743514    | XXXX             | AY841483         | —            | AY743500     | —                 | XXXX            | XXXX |
| <i>Mosannona parva</i><br>Chatrou                                              | Chatrou 23<br>(U)         | Peru       | XXXX        | —           | XXXX        | —                | XXXX             | —            | XXXX         | —                 | —               | XXXX |
| <i>Mosannona raimondii</i><br>(Diels) Chatrou                                  | Morawetz<br>1828985 (U)   | Peru       | XXXX        | —           | XXXX        | —                | XXXX             | —            | XXXX         | —                 | —               | XXXX |
| <i>Mosannona</i> sp.                                                           | Chatrou 71<br>(U)         | Costa Rica | AY743502    | —           | AY743509    | —                | AY841478         | —            | AY743495     | —                 | —               | XXXX |
| <i>Mosannona vasquezii</i><br>Chatrou                                          | Chatrou 226<br>(U)        | Peru       | AY743508    | XXXX        | AY743515    | XXXX             | AY841484         | —            | AY743501     | —                 | XXXX            | XXXX |
| <i>Mosannona xanthochlora</i><br>(Diels) Chatrou                               | Baker 6799<br>(U)         | Ecuador    | —           | XXXX        | —           | —                | XXXX             | —            | XXXX         | —                 | —               | —    |
